# Supplementary material for: Most Relevant Spectral Bands Identification for Brain Cancer Detection Using Hyperspectral Imaging
Source: PubMed Central journal article supplement (PMC6961052; doi:10.3390/s19245481), 2019-12-12
Supplement: sensors-19-05481-s001.pdf [file sensors-19-05481-s001.pdf]

# Most Relevant Spectral Bands Identification for Brain Cancer Detection using Hyperspectral Imaging

## Supplementary Material

**Table S1.** Summary of the labeled dataset employed in the experiments. The numbering of the data corresponds with the dataset publically available in [47].

| Patient ID                         | Image ID | Size<br>(height x width x bands) | #Labeled Pixels (#Reference Pixels) |        |        |         | Diagnosis                 |
|------------------------------------|----------|----------------------------------|-------------------------------------|--------|--------|---------|---------------------------|
|                                    |          |                                  | NT                                  | TT     | HT     | BG      |                           |
| 004                                | 02       | 389 x 345 x 826                  | 5,007                               | 0      | 965    | 1,992   | Normal Brain              |
| 005                                | 01       | 483 x 488 x 826                  | 6,061                               | 0      | 1,727  | 20,483  | Normal Brain              |
| 007                                | 01       | 582 x 400 x 826                  | 7,714                               | 0      | 1,089  | 0       | Normal Brain              |
| 008                                | 01       | 460 x 549 x 826                  | 2,295                               | 1,221  | 1,331  | 630     | Grade IV Glioblastoma (P) |
|                                    | 02       | 480 x 553 x 826                  | 2,187                               | 138    | 1,000  | 7,444   | Grade IV Glioblastoma (P) |
| 010                                | 03       | 371 x 461 x 826                  | 10,626                              | 0      | 2,332  | 3,972   | Grade IV Glioblastoma (P) |
| 012                                | 01       | 443 x 497 x 826                  | 4,516                               | 855    | 8,697  | 1,685   | Grade IV Glioblastoma (P) |
|                                    | 02       | 445 x 498 x 826                  | 6,553                               | 3,139  | 6,041  | 8,731   | Grade IV Glioblastoma (P) |
| 013                                | 01       | 298 x 253 x 826                  | 1,827                               | 0      | 129    | 589     | Normal Brain              |
| 014                                | 01       | 317 x 244 x 826                  | 0                                   | 0      | 64     | 1,866   | Grade IV Glioblastoma (P) |
| 015                                | 01       | 376 x 494 x 826                  | 1,251                               | 2,046  | 4,089  | 696     | Grade IV Glioblastoma (P) |
| 016                                | 01       | 335 x 323 x 826                  | 3,970                               | 0      | 246    | 12,002  | Normal Brain              |
|                                    | 02       | 335 x 326 x 826                  | 349                                 | 0      | 0      | 2,767   | Normal Brain              |
|                                    | 03       | 315 x 321 x 826                  | 603                                 | 0      | 234    | 1,696   | Normal Brain              |
|                                    | 04       | 383 x 297 x 826                  | 1,178                               | 0      | 1,064  | 956     | Grade IV Glioblastoma (P) |
|                                    | 05       | 414 x 292 x 826                  | 2,643                               | 0      | 452    | 5,125   | Grade IV Glioblastoma (P) |
| 017                                | 01       | 441 x 399 x 826                  | 1,328                               | 0      | 68     | 3,069   | Grade IV Glioblastoma (P) |
| 018                                | 01       | 479 x 462 x 826                  | 13,450                              | 0      | 488    | 9,773   | Normal Brain              |
|                                    | 02       | 510 x 434 x 826                  | 4,813                               | 0      | 658    | 5,895   | Normal Brain              |
| 019                                | 01       | 601 x 535 x 826                  | 6,499                               | 0      | 1,350  | 1,933   | Meningioma                |
| 020                                | 01       | 378 x 330 x 826                  | 1,842                               | 3,655  | 1,513  | 2,625   | Grade IV Glioblastoma (P) |
| 021                                | 01       | 452 x 334 x 826                  | 2,663                               | 0      | 2325   | 5,651   | Normal Brain              |
|                                    | 02       | 448 x 324 x 826                  | 2,313                               | 0      | 591    | 4,688   | Normal Brain              |
|                                    | 05       | 433 x 340 x 826                  | 1038                                | 0      | 587    | 10,187  | Normal Brain              |
| 022                                | 01       | 597 x 527 x 826                  | 2,806                               | 0      | 1,064  | 3,677   | Normal Brain              |
|                                    | 02       | 611 x 527 x 826                  | 8,174                               | 0      | 680    | 0       | Normal Brain              |
| Total: 16 Operations - 26 Captures |          |                                  | 101,706                             | 11,054 | 38,784 | 118,132 |                           |

\* NT: Normal Tissue; TT: Tumor Tissue; HT: Hypervascularized Tissue; BG: Background.

Most Relevant Spectral Bands Identification for Brain Cancer Detection using Hyperspectral Imaging  
(Supplementary Material)

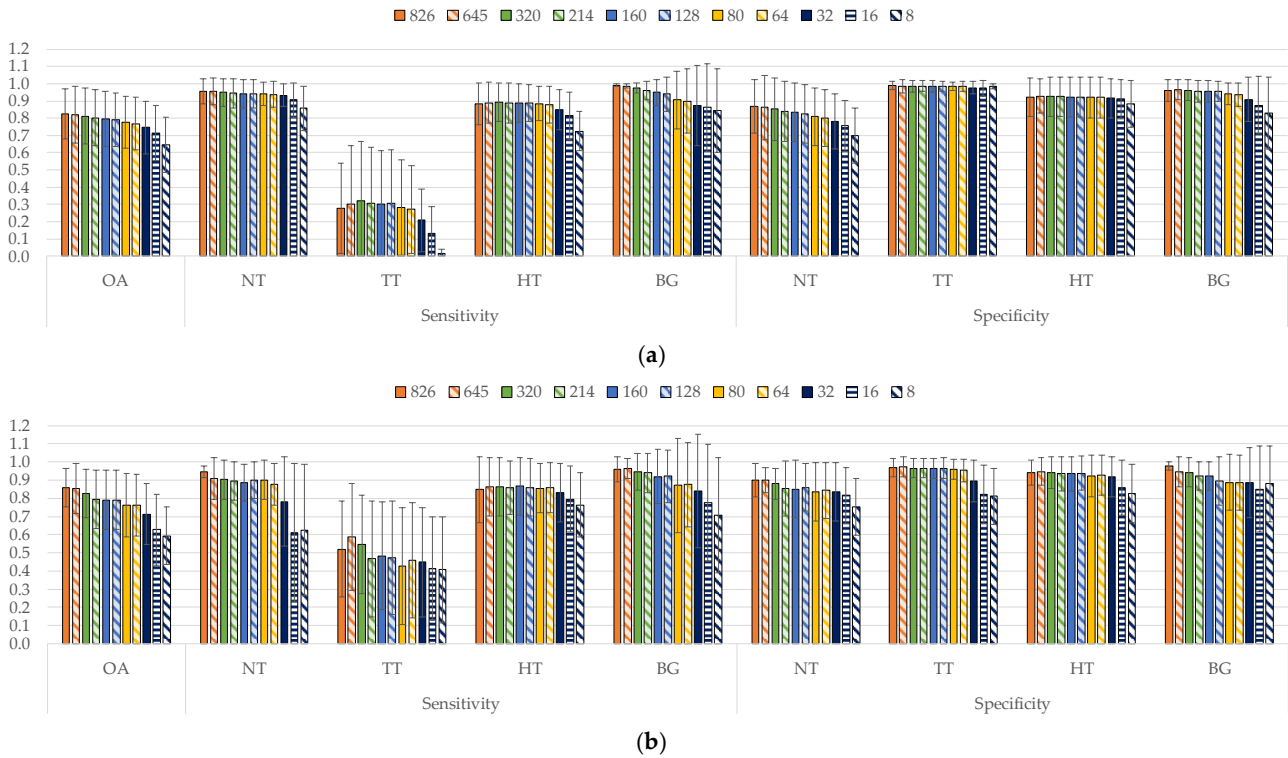

**Figure S1.** Average and standard deviation results of the leave-one-patient-out cross-validation for each band reduction with different sampling interval values. (a) Using the original training dataset. (b) Using the reduced training dataset.

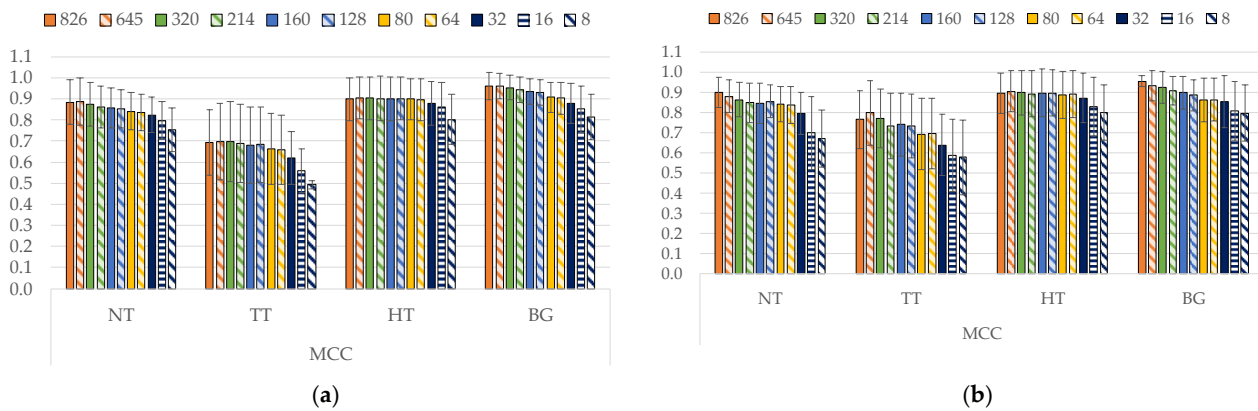

**Figure S2.** Average and standard deviation results of the normalized MCC metric using leave-one-patient-out cross-validation for each band reduction with different sampling interval values. (a) Using the original training dataset. (b) Using the reduced training dataset.

Most Relevant Spectral Bands Identification for Brain Cancer Detection using Hyperspectral Imaging  
(Supplementary Material)

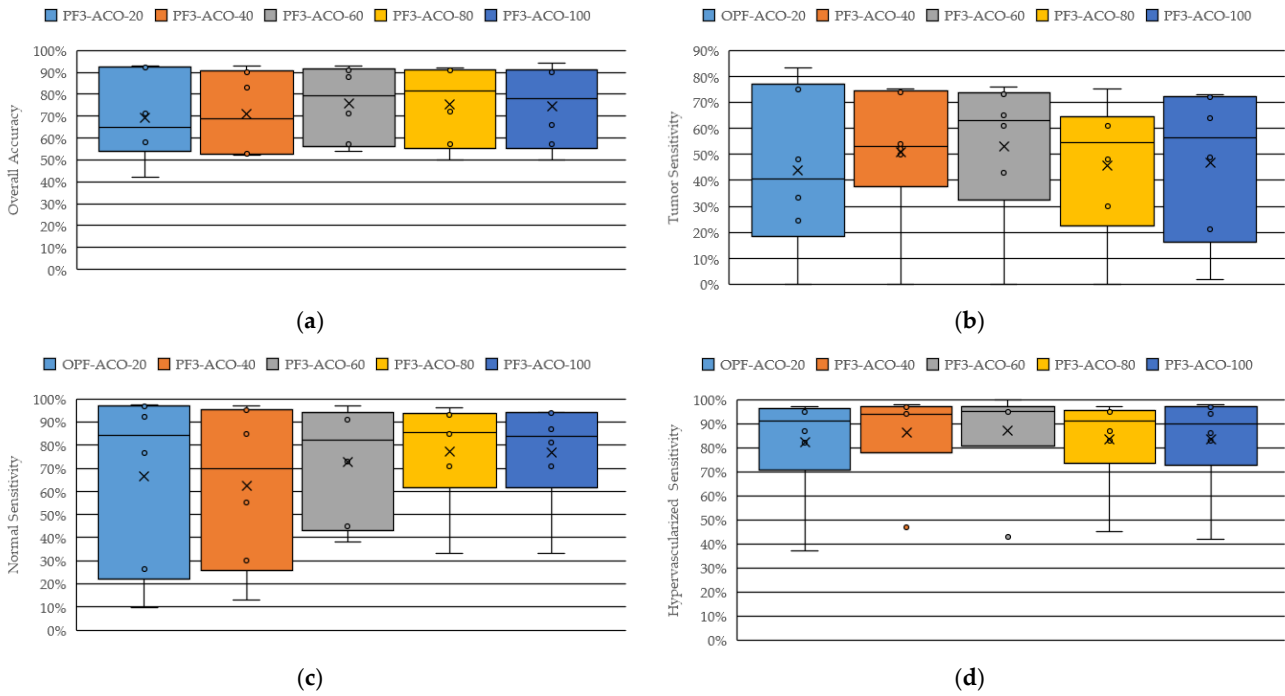

**Figure S3.** Boxplot results of the leave-one-patient-out cross-validation obtained for the *PF3* employing the *ACO* algorithm with different number of bands (20, 40, 60, 80 and 100). (a) Overall accuracy. (b) Tumor tissue sensitivity. (c) Normal tissue sensitivity. (d) Hypervascularized tissue sensitivity.

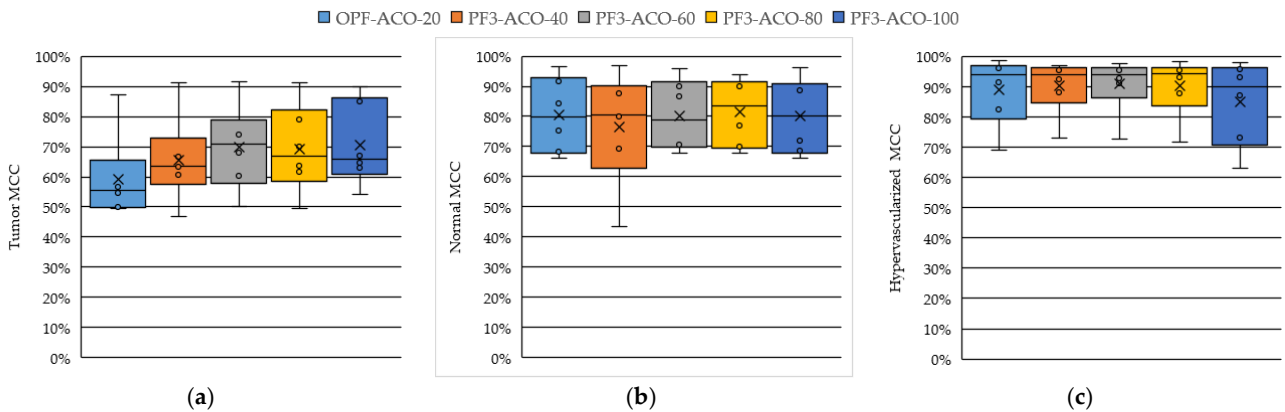

**Figure S4.** Boxplot results of the normalized MCC metric using leave-one-patient-out cross-validation obtained for the *PF3* employing the *ACO* algorithm with different number of bands (20, 40, 60, 80 and 100). (a) Tumor tissue. (b) Normal tissue. (c) Hypervascularized tissue.

**Table S2.** Identification of the specific 48 wavelengths selected by the *GA* in the *PF2* using the *FoM<sub>Penalized</sub>* evaluation metric and the *L1* band combination.

| Band ID | $\lambda$ (nm) | Band ID | $\lambda$ (nm) | Band ID | $\lambda$ (nm) | Band ID | $\lambda$ (nm) | Band ID | $\lambda$ (nm) | Band ID | $\lambda$ (nm) |
|---------|----------------|---------|----------------|---------|----------------|---------|----------------|---------|----------------|---------|----------------|
| 1       | 440.50         | 18      | 502.34         | 43      | 593.29         | 56      | 640.58         | 72      | 698.79         | 95      | 782.46         |
| 2       | 444.14         | 19      | 505.98         | 44      | 596.93         | 57      | 644.22         | 74      | 706.06         | 101     | 804.29         |
| 3       | 447.78         | 20      | 509.62         | 45      | 600.57         | 58      | 647.86         | 75      | 709.70         | 104     | 815.20         |
| 5       | 455.05         | 33      | 556.91         | 46      | 604.20         | 59      | 651.50         | 76      | 713.34         | 117     | 862.49         |
| 7       | 462.33         | 34      | 560.55         | 47      | 607.84         | 60      | 655.13         | 77      | 716.98         | 123     | 884.32         |
| 8       | 465.96         | 36      | 567.83         | 49      | 615.12         | 61      | 658.77         | 78      | 720.62         | 124     | 887.96         |
| 14      | 487.79         | 38      | 575.10         | 53      | 629.67         | 62      | 662.41         | 79      | 724.25         | 126     | 895.23         |
| 17      | 498.71         | 41      | 586.01         | 55      | 636.94         | 63      | 666.05         | 81      | 731.53         | 128     | 902.51         |
